# Supplementary material for: Emerging climate signals in the Lena River catchment: a non-parametric statistical approach
Source: Copernicus journal article supplement (doi:10.5194/hess-24-2817-2020), 2020-05-29
Supplement: Supplementary file 1 [file hess-24-2817-2020-supplement.zip]

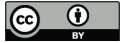

## *Supplement of*

# **Emerging climate signals in the Lena River catchment: a non-parametric statistical approach**

**Eric Pohl et al.**

*Correspondence to:* Eric Pohl ([eric.pohl@unifr.ch](mailto:eric.pohl@unifr.ch))

- [hess-24-2817-2020-supplement-title-page.pdf](#)
- [supplement\\_revised](#)
  - [POHL\\_Eric\\_supplement\\_revised.pdf](#)
  - [Video1.mp4](#)
  - [Video2.mp4](#)

The copyright of individual parts of the supplement might differ from the CC BY 4.0 License.
